# Supplementary material
Source: Research Square preprint supplement (doi:10.21203/rs.3.rs-8950608/v1)
Supplement: Supplementary file 1 [file 36cf87f216c97c66308cbb18.xlsx]

## Sheet: Sheet1
Word	Length	Count	Weighted Percentage (%)	Similar Words
changed	7	282	3.6	action, add, back, build, calm, cash, changed, circle, clear, cross, culture, describe, doctor, effect, equal, even, exchange, factor, feel, felt, focus, form, freeze, french, full, get, give, going, head, help, ice, immigration, influence, integration, issue, journey, key, know, level, light, line, listen, loss, map, mix, mobile, move, number, open, outcome, pain, part, people, perfect, phase, p…
person	6	175	3.26	active, agent, artist, authority, brain, build, builder, child, clerk, customer, doctor, driver, egyptian, engineer, entrepreneur, equal, expert, factor, failure, father, foreigner, form, ghost, guide, head, help, identity, immigrant, incompetent, independent, intellectual, issue, job, leader, life, light, longer, machine, man, minor, miss, mvp, native, natural, officer, outsider, pain, part, par…
artifact	8	156	2.18	airport, art, artifact, back, backbone, bank, barrier, body, bridge, center, construction, cross, design, door, felt, gallery, guide, head, issue, job, key, lead, level, light, line, machine, map, maze, number, paper, platform, point, post, presentation, product, safety, school, simulation, station, stay, steps, stop, store, story, support, system, tool, top, train, university, utility, wall, wel…
abstract	8	194	1.87	abstract, action, agency, analysis, art, audio, background, bad, bill, body, brain, bridge, business, chart, circle, community, conflict, correspondence, data, defeated, direction, door, ecosystem, exhibition, feel, form, hand, head, history, identity, knowledge, language, level, life, line, list, lost, man, map, mobility, narrative, nothing, number, office, painting, part, people, point, post, p…
construction	12	121	1.44	abstract, artifact, barrier, bill, body, bridge, cage, center, construction, cross, describe, door, external, factor, form, gallery, guide, head, ice, keep, kitchen, level, like, line, logic, office, one, part, platform, point, product, right, school, simulation, stop, story, structured, support, teacher, thought, total, university, value, wall, zero
community	9	150	1.41	account, acknowledge, agent, analysis, art, ask, audio, bill, body, chart, community, consult, conversation, correspondence, debate, describe, direction, discuss, effect, email, explain, expressive, fear, form, get, ghost, give, hand, head, interview, issue, keep, key, language, lead, level, light, line, narrative, number, person, phone, pitch, play, point, post, present, presentation, presenter,…
active	6	180	1.33	action, active, analysis, art, back, bridge, business, cards, care, center, construction, cross, design, designing, direction, doctor, feel, first, going, hand, head, help, hiding, intervention, issue, job, last, lead, leadership, life, line, looking, move, negotiation, office, open, painting, part, person, persona, play, post, practice, prefecture, presentation, profession, reading, research, re…
language	8	73	1.13	accent, conference, conversation, debate, egyptian, exchange, interview, language, module, negotiation, question, reading, saw, talk, talking, terminology, word, words
evaluation	10	114	1.02	abstract, acknowledge, authority, bank, bill, clear, evaluation, feel, fight, judged, judging, know, like, respect, review, see, think, understand, value, valued, values, view
think	5	130	0.97	abstract, acknowledge, add, analysis, care, center, chart, construction, design, engineer, factor, fear, feel, focus, give, ideation, key, know, like, line, listen, mistake, plan, play, question, reasonable, research, respect, review, see, think, thought, time, value, view
part	4	79	0.9	appendix, audio, back, backbone, behind, body, border, bridge, factor, form, going, hand, handle, head, language, line, module, move, open, part, phone, point, right, saw, small, sound, store, support, system, terminology, top, train, turning, voice, wall, word, world
egyptian	8	35	0.88	egyptian, 'egyptian
work	4	89	0.88	action, analysis, authority, bank, business, care, clerk, danger, exchange, form, get, going, handle, help, influence, intervention, issue, job, learning, line, machine, makes, man, manage, medical, move, number, office, part, play, product, ready, research, review, role, runs, service, services, staff, tool, turning, understand, use, utility, wait, work, worked, workshop
point	5	88	0.86	back, cairo, center, circle, direction, doctor, exchange, factor, first, focus, head, indicating, job, last, lead, level, line, mobile, moment, part, phase, pitch, point, pointed, post, respect, right, site, situation, station, stop, stopped, target, time, top, train, work, workshop
designed	8	44	0.85	cross, design, designed, designing, engineer, exchange, father, indicating, map, miss, number, plan, point, pointed, post, shows, system, think, view
feel	4	75	0.79	appear, care, conflict, dignity, effect, fear, feel, feels, looking, looks, pain, panic, passion, respect, security, see, sense, soul, think, thought, want
knowledge	9	87	0.78	art, background, brain, center, cognitive, culture, design, direction, experienced, food, form, hand, head, history, influence, issue, knowledge, language, lead, leadership, learning, level, life, light, module, open, passion, perspective, plan, point, power, practice, reading, respect, sense, specific, symptom, system, target, thought, values, view, vocabulary, world
move	4	90	0.76	acknowledge, ask, bank, build, center, circle, effect, exchange, fight, get, give, handle, immigration, issue, journey, keep, light, list, manage, mobile, move, parking, part, participate, pitch, pitching, play, post, practice, return, saw, see, site, socialize, speak, speed, station, talk, top, train, travel, use, wait, walking, work, worrying
present	7	43	0.76	bill, defend, exhibition, give, moment, now, present, presentation, presented, presenter, shows, speak, support, talk
see	3	101	0.72	abstract, debate, fear, feel, know, like, play, respect, review, see, think, understand, value, view
artist	6	37	0.71	artist, artistic, cage, french
helped	6	33	0.69	care, guide, hand, help, help', helped, helps, man, see, service, services, support, utility, work, worker
people	6	45	0.66	business, center, defeated, french, lost, people, world
traveler	8	73	0.66	back, bridge, circle, clear, cross, foreigner, ghost, going, head, immigrant, journey, lead, light, move, negotiate, person, pitch, play, post, refugee, return, school, see, someone, soul, speed, stranger, tool, top, train, travel, traveled, traveler, walking, well, work
french	6	34	0.63	french, 'french
now	3	24	0.63	direction, now, present, presentation, presented, presenter
linguistic	10	12	0.57	grammar, linguistic, person, someone, soul, translator
want	4	45	0.57	care, like, miss, needed, needs, requirement, requirements, want, wanted
power	5	43	0.56	art, authority, brain, command, design, hand, influence, knowledge, language, leadership, might, module, office, officer, persuasiveness, power, 'power, 'power', right, rights, sense, system
appear	6	72	0.55	appear, effect, feel, form, ghost, light, looking, looks, persona, perspective, phase, return, shows, simulation, sound, view
stepping	8	16	0.53	handle, move, security, sound, stepping, 'stepping, steps, support, travel
professional	12	28	0.52	authority, doctor, expertise, head, key, mastered, pharmacist, professional, 'professional, teacher
participants	12	28	0.51	active, back, center, driver, hand, intervention, involved, move, mvp, participant, participants, participate, participating, receiver
practice	8	32	0.51	experienced, expert, knowledge, much, practice, practiced, protocol, review, training, use, used, using, utility, worrying
meetings	8	29	0.5	bank, border, conference, cross, just, manage, meetings, party, receiver, 'receivers, see, seminar, stay, team
socially	8	17	0.5	cultural, friendly, party, person, ready, social, socialize, socially, someone, soul
support	7	45	0.49	back, backbone, bridge, care, defend, defended, friendly, give, help, influence, keep, lead, part, play, post, see, spoke, stay, support, voice
stones	6	7	0.48	stones, stones'
gave	4	7	0.48	gave
created	7	59	0.46	action, build, chart, clear, created, cross, design, effect, engineer, father, form, get, give, influence, keep, lead, machine, makes, map, move, pain, plan, play, present, ready, return, script, see, support, think, time, work
modules	7	34	0.46	direction, focus, language, module, modules, play, power, sense, speak, talk, transition
know	4	65	0.45	acknowledge, discovery, feel, know, knowledge, learning, light, see, sense, think
expressive	10	46	0.44	accent, account, add, ask, background, construction, explain, expressive, fast, get, give, language, light, looking, looks, post, present, return, saw, shout, shows, sound, time, voice, word
form	4	52	0.44	add, border, circle, form, grades, head, influence, like, line, makes, point, word, work
direction	9	45	0.43	care, command, direction, engineer, give, guide, handle, head, lead, level, license, manage, manageable, managing, move, plan, point, pointed, primary, protocol, return, target, target', train, training, work
system	6	24	0.43	body, design, ecosystem, line, logic, maze, plan, platform, system, systemic, vocabulary
prototyped	10	7	0.42	first, prototyped, prototyping
realized	8	24	0.42	actually, clear, clearly, completely, get, know, makes, manage, manageable, managing, realized, see, sense, soul, understand
documentation	13	28	0.41	account, bill, documentation, form, license, line, paper, passport, platform, report, resolution, return, security, support, well
parties	7	18	0.41	builder, circle, dinner, formal, parties, party, person, social, someone, soul
authority	9	39	0.4	authoritative, authority, back, bureaucracy, clear, clearly, command, confident, defend, direction, expert, ghost, key, license, person, post, professional, service, someone, soul, support
like	4	44	0.4	care, correspondence, form, like, see, similar, view, want
different	9	17	0.39	conflict, different, dispute, fight, number, words
get	3	63	0.39	beggar, clear, effect, feel, get, give, influence, lead, light, makes, receiver, 'receivers, return, secure, understand
reasonable	10	66	0.39	account, add, analysis, factor, feel, give, line, number, reasonable, resolution, sound, sounded, sounds, think, thought
script	6	10	0.38	hand, hands, script, script', scripts
words	5	38	0.37	ask, conference, conflict, debate, discuss, dispute, form, head, interview, language, line, negotiation, phrases, son, terminology, word, words
just	4	17	0.36	exactly, hard, just, precise, right, rights
medical	7	11	0.36	freeze, medical, medically, medicine, specific
right	5	22	0.36	abstract, door, hand, just, right, rights, turning, use
thought	7	39	0.36	abstract, design, effect, factor, form, lost, mistake, part, plan, play, product, right, strategy, system, teacher, thought, total, value
used	4	37	0.36	give, help, influence, move, old, play, practice, role, service, use, used, using, utility, victim, work
worker	6	25	0.36	agent, chef, clerk, driver, hand, help, independent, laborer, man, officer, person, post, someone, soul, worker
workshop	8	12	0.36	work, workshop, workshops
give	4	60	0.35	accent, acknowledge, back, bank, border, get, give, hand, hands, help, key, lead, makes, man, move, open, power, present, refund, return, staff, stay, support, think, tool, top, use, word
launchpad	9	12	0.35	launchpad, 'launchpad', platform
level	5	31	0.35	construction, even, launchpad, level, platform, speak, stories, story, talk, top, train
visual	6	7	0.34	see, view, visual
got	3	5	0.34	got
machine	7	20	0.33	criminal, form, machine, person, saw, simulator, site, someone, soul, work
open	4	29	0.33	active, artifact, bill, capable, clear, clearly, first, give, issue, move, open, opened, person, point, raw, someone, soul, unprotected
success	7	13	0.33	action, health, made, natural, person, safety, someone, soul, success
account	7	39	0.32	account, answered, bill, business, construction, describe, history, job, life, line, reading, report, reported, responsible, review, stories, story, system, talk
'texture	8	46	0.32	feel, 'texture
ask	3	21	0.31	ask, asked, command, consult, interview, involved, needed, needs, question, 'request, requirement, requirements, word
completely	10	18	0.31	action, completely, full, perfect, play, purely, realized, sound, top, total
respected	9	14	0.31	fear, point, report, respect, respected, respects, see, value, valued, values, view
included	8	9	0.3	add, border, included, including, see, view
issue	5	22	0.3	child, effect, emergency, influence, issue, number, outcome, product, results, return, returned, son, store
persuasive	10	12	0.3	line, persuasive, persuasiveness, power, thought, view, weapon
sound	5	26	0.3	appear, full, play, reasonable, report, safe, secure, sound, sounded, sounds, speak, voice
technical	9	8	0.3	expert, point, technical
makes	5	40	0.29	action, appear, effect, form, get, head, help, influence, keep, makes, move, number, phase, play, ready, secure, see, time, top, total, view
speak	5	36	0.29	consult, debate, discuss, dispute, interview, lead, level, negotiate, present, question, reading, shout, sound, speak, talk, talk', talking
body	4	27	0.28	body, build, bureaucracy, consistently, construction, form, immigration, leadership, person, profession, school, staff, system, university
'easy	5	7	0.28	'easy, light, 'light, simple, simplified
map	3	19	0.28	chart, design, identity, map, map', maps, plan
play	4	48	0.28	action, back, business, doctor, lead, meetings, move, natural, part, persona, pitch, pitching, play, return, role, runs, see, service, sound, support, travel, turning, use, work
provided	8	35	0.28	border, care, crew, give, help, key, man, open, power, provided, ready, staff, stay, support, tool, top
assertive	9	6	0.27	assertive, 'assertive, insisted, maintain, profession
cards	5	20	0.27	bill, bridge, cards, correspondence, pitch, see, three, two
number	6	18	0.27	add, factor, first, lead, list, number, one, product, three, total, turning, two, zero
karama	6	4	0.27	karama
p01	3	4	0.27	p01
p05	3	4	0.27	p05
p14	3	4	0.27	p14
went	4	4	0.27	went
action	6	37	0.26	action, active, agency, conflict, effect, exchange, fight, freeze, going, move, pitch, pitching, play, resolution, respect, return, speed, success, traffic, transition, travel, turning, work
barrier	7	12	0.26	barrier, barriers, door, wall
business	8	35	0.26	active, agency, business, construction, issue, job, line, medicine, office, painting, paper, people, post, prefecture, profession, service, services, situation, target, work
corrects	8	21	0.26	corrects, focus, key, phase, precise, right, rights, service, time, zero
line	4	29	0.26	artifact, baseline, border, direction, form, head, intervention, line, part, people, product, steps, support, voice, words
platform	8	20	0.26	bridge, construction, launchpad, level, platform, top
administrative	14	18	0.25	administrative, body, build, bureaucracy, care, direction, handle, head, manage, manageable
aggregated	10	17	0.25	aggregated, data, exhibition, hand, mix, number, person, post, product, someone, soul, traffic, train
embarrassed	11	5	0.25	difficult, embarrassed, hard
guide	5	23	0.25	command, construction, direction, expert, guide, hand, head, lead, leader, point, pointed, runs, templates
agency	6	17	0.24	action, agency, authority, business, office, officer, police, tool, voice
command	7	34	0.24	authority, care, command, commands, direction, ghost, give, guide, handle, head, lead, leader, man, manage, officer, point, requirement, requirements, word, work
conversation	12	31	0.24	conversation, debate, dispute, exchange, interview, language, question, speak, talk, talking, transition
explain	7	10	0.24	clear, explain, explained
grades	6	12	0.24	construction, evaluation, even, grades, level, top, value
muted	5	8	0.24	muted, quiet, 'quiet, silence, silent
terms	5	10	0.24	life, point, terms, time, word
times	5	12	0.24	hour, influence, lead, life, moment, morning, time, times
walked	6	10	0.24	cross, move, play, travel, walked, walking
containing	10	20	0.23	bank, border, containing, form, keep, safe, silence, system, train, well
father	6	9	0.23	father, get, head, leader, parent
legally	7	7	0.23	effect, 'legal, legally, sound, sounded, sounds
old	3	11	0.23	experienced, old, senior, sometimes, used
natural	7	20	0.22	calm, explain, natural, practice, quiet, success, world
simulator	9	12	0.22	form, machine, play, simulation, simulator
specific	8	6	0.22	medicine, specific, specs
students	8	10	0.22	doctor, father, intellectual, senior, student, students
themes	6	13	0.22	form, head, line, paper, question, report, reported, themes, thought
tool	4	14	0.22	agency, bill, saw, tool, tools, work
structured	10	38	0.21	back, backbone, brain, bridge, center, design, form, head, knowledge, plan, structured, system
built	5	3	0.2	built
colleagues	10	3	0.2	colleagues
flowcharts	10	3	0.2	flowcharts
invisible	9	3	0.2	hidden, invisible
keep	4	20	0.2	defend, freeze, hands, keep, maintain, move, post, ready, silence, stay, stop, store, train, wall, warehouse
less	4	3	0.2	less, 'less
linked	6	26	0.2	bridge, command, form, know, line, linked, point, post, secure, service, stay, think
peer	4	11	0.2	equal, participant, peer, peers, person, someone, soul
qualitative	11	3	0.2	qualitative
solidarity	10	3	0.2	solidarity
translated	10	11	0.2	equal, move, reading, translated, translator, travel, understand
week	4	3	0.2	week
everything	10	3	0.2	everything
fashal	6	3	0.2	fashal, 'fashal'
gada'na	7	3	0.2	gada'na
makshouf	8	3	0.2	makshouf, 'makshouf'
care	4	33	0.19	build, care, command, fear, give, guide, handle, head, help, intervention, lead, manage, manageable, managing, see, service, work, worrying
creatively	10	12	0.19	creatively, design, power
looking	7	17	0.19	bank, care, looking, looks, peer, see, sound, sounded, sounds, view, wait
raw	3	11	0.19	natural, open, pain, raw, unfair
restored	8	10	0.19	artifact, corrects, medicine, refund, restored, return, returned, simulation
situation	9	9	0.19	imbalance, map, nightmare, situation
turning	7	33	0.19	bank, calm, exchange, form, freeze, get, map, move, open, return, right, top, train, travel, turning, work
'health	7	4	0.18	health, 'health, well
shows	5	30	0.18	appear, exhibition, give, guide, lead, map, number, open, play, present, presentation, review, shows, support, view
cried	5	7	0.17	cried, insisted, shout, shouting, sound, want
cultural	8	7	0.17	cultural, culture, social
needed	6	17	0.17	account, life, light, needed, needs, passion, requirement, requirements, want
safe	4	11	0.17	safe, safety, secure, security, sound
talk	4	13	0.17	conversation, negotiate, negotiation, negotiation', talk, talk', talking, word
understand	10	21	0.17	clear, clearly, discovery, focus, get, light, module, reasonable, see, sense, understand, work
bank	4	8	0.16	bank, 'banking, give, work
conference	10	12	0.16	conference, conferences, consult, discuss, interview, present, seminar, word
debate	6	11	0.16	argued, debate, debating, discuss, dispute, see, word
discovery	9	10	0.16	discovery, documentation, resolution, support
'emotion	8	10	0.16	care, 'emotion, emotional, fear, panic, passion, play
exchange	8	11	0.16	changed, conversation, exchange, similar, work
going	5	22	0.16	active, failing, get, going, lead, loss, move, open, runs, sound, sounded, sounds, stop, turning, work
head	4	25	0.16	brain, direction, father, form, gallery, head, knowledge, lead, leader, line, point, pointed, question, top, user, word
life	4	17	0.16	account, history, life, light, person, someone, soul, story, time, years
mastered	8	18	0.16	artist, command, head, key, know, mastered, officer, perfect, student, superior
pain	4	10	0.16	bad, hurts, pain, passion, raw, symptom
belonged	8	4	0.15	belonged, going
calm	4	7	0.15	calm, 'calm, quiet, 'quiet
'client	7	3	0.15	'client, customer
handle	6	17	0.15	direction, discuss, handle, manage, manageable, managing, mix, play, stop, treated, treats, work
'hazard'	8	3	0.15	danger, 'hazard', 'risk
intellectual	12	12	0.15	brain, doctor, father, intellectual, intellectually, person, someone, soul, student
learning	8	24	0.15	learning, practice, reading, school, see, talk, train, work
minutes	7	9	0.15	minutes, moment, point, small, time
plan	4	22	0.15	chart, design, designing, engineer, plan, play, strategy, system, think, thought, time
'response	9	17	0.15	effect, hands, issue, job, outcome, requirement, respect, 'response, responsible, return
reveals	7	9	0.15	discovery, reveals, talk
stopped	7	12	0.15	cards, clear, containing, defend, stay, stop, stopped, top
utility	7	12	0.15	driver, exchange, service, used, user, utility
always	6	2	0.14	always
arabic	6	2	0.14	arabic
back	4	19	0.14	back, backbone, backed, defend, move, play, support, travel
broken	6	2	0.14	broken
chef	4	3	0.14	chef, 'chef
entrepreneurial	15	2	0.14	entrepreneurial
every	5	2	0.14	every
experienced	11	6	0.14	experienced, old, practiced
fillers	7	2	0.14	fillers
foreigner	9	7	0.14	external, foreigner, outsider, stranger, traveler
glossary	8	2	0.14	glossary
heard	5	2	0.14	heard
hierarchy	9	2	0.14	hierarchy
impatient	9	2	0.14	impatient
indicating	10	16	0.14	account, baseline, hand, history, indicating, level, line, reading, story, symptom, target
investors	9	2	0.14	investors
landlord	8	2	0.14	landlord
phrasals	8	2	0.14	phrasals
product	7	23	0.14	culture, effect, exhibition, issue, job, leader, line, number, outcome, paper, presentation, product, turning, work
quiet	5	9	0.14	calm, quiet, 'quiet, silence, silent
secure	6	10	0.14	fast, protected, safety, secure, security, stay
sided	5	21	0.14	back, bank, hand, head, line, part, sided, top, view
spouse	6	3	0.14	spouse, spouse'
weak	4	4	0.14	powerless, powerlessness, stupid, weak
yesterday	9	2	0.14	yesterday
'bof'	5	2	0.14	'bof'
chose	5	2	0.14	chose
p02	3	2	0.14	p02
p03	3	2	0.14	p03
p04	3	2	0.14	p04
p06	3	2	0.14	p06
p07	3	2	0.14	p07
p08	3	2	0.14	p08
p09	3	2	0.14	p09
p10	3	2	0.14	p10
p11	3	2	0.14	p11
p12	3	2	0.14	p12
p13	3	2	0.14	p13
p15	3	2	0.14	p15
p16	3	2	0.14	p16
p17	3	2	0.14	p17
p18	3	2	0.14	p18
ssig	4	2	0.14	ssig
subjonctif	10	2	0.14	subjonctif
'the	4	2	0.14	'the
without	7	2	0.14	without
accent	6	8	0.13	accent, accent', action, background, focus
build	5	20	0.13	body, build, business, center, construction, form, ice, makes, manage, person, school
defend	6	20	0.13	back, defend, defended, keep, maintain, officer, stop, support, wall
dispute	7	14	0.13	argued, combat', conflict, debate, dispute, fight, person, someone, soul
doctor	6	13	0.13	doctor, play, point, restored, secure, student
'impact	7	16	0.13	effect, fight, form, 'impact, influence, issue, outcome, work
involved	8	7	0.13	active, involved, part, participating, world
leader	6	16	0.13	father, foreman, guide, head, job, leader, person, someone, soul, superior
negotiation	11	9	0.13	agent, discuss, negotiate, negotiation, negotiation', translator
protected	9	19	0.13	back, care, defend, keep, protected, security, wall
question	8	10	0.13	ask, interview, question, suspicious
reading	7	20	0.13	language, reading, see, shows, speak, talk, understand
trying	6	12	0.13	difficult, fight, hard, move, pain, part, play, trying
victim	6	9	0.13	job, person, scams, someone, soul, target, victim
expert	6	13	0.12	authority, expert, expertise, guide, person, professional, someone, soul
fight	5	9	0.12	active, combat', conflict, defend, defended, fight, struggled
food	4	5	0.12	brain, dinner, food, mix
lead	4	23	0.12	direction, discuss, get, give, head, lead, leadership, move, play, results, runs, superior, top, travel
maintain	8	9	0.12	explain, keep, maintain
office	6	17	0.12	business, command, job, line, man, office, officer, post, prefecture, situation, staff
proposed	8	10	0.12	ghost, move, plan, presentation, proposed, question, think
refused	7	4	0.12	beggar, freeze, keep, refused
research	8	4	0.12	consult, research, researcher, researchers
senior	6	9	0.12	last, old, senior, superior
shout	5	14	0.12	shout, shouting, speak, talk
treated	7	12	0.12	center, doctor, give, medicine, present, treated, treats
voice	5	7	0.12	active, agency, passive, sound, voice
agent	5	5	0.11	active, agent, agentic, factor
art	3	12	0.11	art, business, designing, history, logic, mobile, painting, view
bill	4	13	0.11	account, bill, cards, list, post, saw
capable	7	7	0.11	capable, competent, confident, equal
crew	4	6	0.11	crew, man, team
criminal	8	3	0.11	criminal, guilty, handle
discuss	7	16	0.11	consult, debate, discuss, handle, lead, negotiate, participant, see, talk
exactly	7	10	0.11	ask, command, exactly, perfect, precise, right
hand	4	17	0.11	guide, hand, hands, help, laborer, lead, power, right
judged	6	5	0.11	clear, give, judged, judging, trying
listen	6	6	0.11	center, focus, listen, listened
narrative	9	11	0.11	account, narrative, report, stories, story, storyteller
pitch	5	9	0.11	key, move, pitch, pitched, pitching, play
'request	8	13	0.11	action, ask, command, keep, question, 'request, want
role	4	18	0.11	back, center, first, office, officer, part, persona, role
runs	4	16	0.11	action, get, last, move, return, runs, speed, travel, work
silent	6	4	0.11	quiet, silent, understood
small	5	5	0.11	minor, small
total	5	7	0.11	add, aggregated, completely, integration, number, total
bad	3	5	0.1	bad, hard, incompetent, loss
center	6	14	0.1	center, direction, focus, focused, listen, move, point, see, think
consult	7	15	0.1	action, ask, authority, conference, consult, practice, research
effect	6	18	0.1	action, competent, effect, get, help, move, person, power, someone, soul, symptom
excerpts	8	2	0.1	excerpts, selected
failure	7	7	0.1	failing, failure, loss, miss
identified	10	11	0.1	identified, know, list, mistake, number, see, view
influence	9	19	0.1	backbone, effect, influence, issue, outcome, power, support, time, use
light	5	9	0.1	light, 'light, perspective, return, value, view, weak
one	3	5	0.1	identity, one
owns	4	2	0.1	owns, personal
panicked	8	2	0.1	afraid, panicked
qualified	9	5	0.1	add, qualified, success, train
stupid	6	5	0.1	mistake, simple, stupid, weak
value	5	12	0.1	account, moment, see, value, valued, values, view
answered	8	8	0.09	answered, 'response, responsible, return, work
audio	5	7	0.09	audio, sound, sounded, sounds
defeated	8	8	0.09	defeated, failure, people
describe	8	7	0.09	cross, describe, identified, key, line
equal	5	9	0.09	capable, competent, equal, even, level, support
fear	4	6	0.09	afraid, bad, fear, panic, respect, value
focus	5	8	0.09	accent, focus, focused, point
frequently	10	4	0.09	customer, frequently, support
hour	4	4	0.09	hour, minutes, morning, time
insecure	8	2	0.09	danger, insecure
lost	4	7	0.09	lost, miss, people, ruined
man	3	14	0.09	crew, man, officer, person, someone, soul, staff, work, world
mistake	7	6	0.09	failure, mistake, similar, slipping
primary	7	3	0.09	mastered, primary
recurring	9	5	0.09	recurring, return, use
ruined	6	8	0.09	cross, failure, get, key, lost, ruined
seminar	7	3	0.09	conference, seminar, seminars
speakers	8	2	0.09	speakers, storyteller
strategies	10	2	0.09	strategies, strategy
superior	8	5	0.09	foreman, leader, senior, superior
target	6	9	0.09	business, point, target, target', victim
thanked	7	6	0.09	acknowledge, help, thanked
argued	6	8	0.08	argued, defend, indicating, present, reasonable, support
away	4	2	0.08	away, outsider
briefing	8	3	0.08	abstract, briefing
buyer'	6	2	0.08	buyer', customer
emergency	9	3	0.08	appear, emergency
engineer	8	14	0.08	design, engineer, ice, person, plan, profession, someone, soul
failing	7	6	0.08	failing, failure, miss, weak
formal	6	8	0.08	clear, formal, practice
friendly	8	8	0.08	friendly, light, person, social, someone, soul
key	3	9	0.08	key, list, painting, paintings, pitch, return
laborer	7	12	0.08	business, danger, fight, hand, laborer, painting, work
last	4	7	0.08	going, last, senior
logic	5	8	0.08	formal, logic, sense, system
mobile	6	7	0.08	mobile, mobility, move, play
profession	10	11	0.08	acknowledge, business, job, line, medicine, profession, professional
purely	6	4	0.08	clear, light, native, purely
return	6	12	0.08	get, give, key, light, move, refund, return, returned, travel, turning
school	6	10	0.08	body, school, train, training
slipping	8	10	0.08	artifact, give, hand, lead, mistake, move, slipping, stay
stay	4	8	0.08	keep, secure, stay, stop, stopped
store	5	9	0.08	issue, keep, store, warehouse
anymore	7	1	0.07	anymore
around	6	1	0.07	around
broke	5	1	0.07	broke
chronic	7	1	0.07	chronic
combat'	7	9	0.07	combat', conflict, fight, person, someone, soul, superior
competent	9	7	0.07	capable, competent, equal, play
confident	9	6	0.07	capable, confident, give, hand, security
conflict	8	6	0.07	action, conflict, fight, struggled
correspondence	14	7	0.07	correspondence, equal, similar, support
deeply	6	1	0.07	deeply
demographic	11	1	0.07	demographic
egypt	5	1	0.07	egypt
'empty'	7	2	0.07	clear, 'empty'
fast	4	4	0.07	fast, immobile, keep, speed
faulty	6	1	0.07	faulty
flattened	9	2	0.07	flattened, form
highlights	10	2	0.07	highlights, light
incident	8	1	0.07	incident
isolated	8	3	0.07	get, isolated, part
massive	7	1	0.07	massive
maze	4	7	0.07	lost, maze, system
mispronounce	12	1	0.07	mispronounce
miss	4	7	0.07	failure, lost, miss, want
misunderstood	13	1	0.07	misunderstood
month	5	1	0.07	month
nervous	7	1	0.07	nervous
nothing	7	4	0.07	conversation, nothing, zero
occasionally	12	1	0.07	occasionally
parisian	8	1	0.07	parisian
phonetic	8	1	0.07	phonetic
rather	6	1	0.07	rather
recently	8	1	0.07	recently
reliant	7	1	0.07	reliant
salary	6	1	0.07	salary
selected	8	8	0.07	action, move, resolution, return, selected, superior
sense	5	9	0.07	logic, looking, module, sense, understand, view
sent	4	1	0.07	sent
shopkeeper	10	1	0.07	shopkeeper
sold	4	1	0.07	sold
staff	5	8	0.07	body, crew, man, office, staff
stuck	5	1	0.07	stuck
summary	7	6	0.07	abstract, review, summary
top	3	14	0.07	clear, clearly, head, ice, level, part, platform, point, superior, top
transcripts	11	1	0.07	transcripts
'admin	6	1	0.07	'admin
anything	8	1	0.07	anything
app	3	1	0.07	app
caf	3	1	0.07	caf
cdwp	4	1	0.07	cdwp
emploi	6	1	0.07	emploi
everyone	8	1	0.07	everyone
fle	3	1	0.07	fle
gamified	8	1	0.07	gamified
knew	4	1	0.07	knew
pôle	4	1	0.07	pôle
psychosocial	12	1	0.07	psychosocial
ran	3	1	0.07	ran
safer	5	1	0.07	safer
sim	3	1	0.07	sim
socio	5	1	0.07	socio
than'	5	1	0.07	than'
took	4	1	0.07	took
toward	6	1	0.07	toward
ust	3	1	0.07	ust
acknowledge	11	3	0.06	acknowledge, hospitality, morning
clear	5	7	0.06	clear, clearly, focus, light, 'light, perfect
cross	5	13	0.06	bridge, construction, cross, point, see, travel
customer	8	10	0.06	build, customer, practice, use
driver	6	5	0.06	driver, utility, worker
external	8	6	0.06	doctor, external, outsider
freeze	6	3	0.06	freeze, ice, immobile
history	7	6	0.06	history, knowledge, stories, story
hurts	5	5	0.06	get, hurts, pain
integration	11	3	0.06	integration, mix, structured
leadership	10	8	0.06	body, leader, leadership, power
parking	7	9	0.06	guide, head, parking, point
phone	5	6	0.06	phone, receiver, sound, sounded, sounds, stop
receiver	8	6	0.06	get, phone, receiver, 'receivers, see, view
train	5	10	0.06	practice, review, train, training
weapon	6	2	0.06	seeker, weapon
background	10	5	0.05	accent, background, view
circle	6	8	0.05	circle, form, move, party, right, travel
consistently	12	2	0.05	consistently, logic
hospitality	11	4	0.05	hospitality, open
interview	9	7	0.05	conference, consult, interview, question
manage	6	6	0.05	build, manage, manageable, managing, move
outsider	8	7	0.05	external, open, outsider, part, right
painting	8	3	0.05	art, painting, paintings
perfect	7	4	0.05	clear, culture, mastered, perfect
resolution	10	4	0.05	answered, resolution, results
review	6	9	0.05	practice, review, think
symptom	7	7	0.05	add, effect, pain, passion, symptom
university	10	4	0.05	body, university, world
view	4	9	0.05	background, design, looking, view
factor	6	8	0.04	add, factor, number, part, point, resolution
immigrant	9	3	0.04	body, immigrant, immigration
phrases	7	2	0.04	construction, phrases
soul	4	3	0.04	emotional, ghost, soul
hard	4	3	0.03	bad, body, hard
list	4	7	0.03	bill, key, list, move, number, post
minor	5	3	0.03	conference, minor, number
outcome	7	4	0.03	outcome, results, train
worrying	8	5	0.03	business, fear, worrying
results	7	4	0.02	level, point, results
stories	7	3	0.02	action, stories, story
