# Supplementary material
Source: Research Square preprint supplement (doi:10.21203/rs.3.rs-8950608/v1)
Supplement: Supplementary file 2 [file a32bc60fc6bc2b5fde4f3a8b.xlsx]

## Sheet: Sheet1
FREQUENCIES VARIABLES=Age PreTestFLEPP PostTestFLEPP PreSurveySPCC PostSurveySPCC
/STATISTICS=STDDEV MEAN
/ORDER=ANALYSIS.
Frequencies
Notes
Output Created		14-JAN-2026 22:52:16
Comments
Input	Active Dataset	$DataSet
	Filter	<none>
	Weight	<none>
	Split File	<none>
	N of Rows in Working Data File	58
Missing Value Handling	Definition of Missing	User-defined missing values are treated as missing.
	Cases Used	Statistics are based on all cases with valid data.
Syntax		FREQUENCIES VARIABLES=Age PreTestFLEPP PostTestFLEPP PreSurveySPCC PostSurveySPCC /STATISTICS=STDDEV MEAN /ORDER=ANALYSIS.
Resources	Processor Time	00:00:00.02
	Elapsed Time	00:00:00.01
Statistics
		Age	Pre-Test (FLE-PP)	Post-Test (FLE-PP)	Pre-Survey (SPCC)	Post-Survey (SPCC)
N	Valid	58	58	58	58	58
	Missing	0	0	0	0	0
Mean		32.7759	10.2241	18.3621	2.20172	4.12931
Std. Deviation		8.66743	1.74761	2.22189	0.371101	0.382058
Frequency Table
Age
		Frequency	Percent	Valid Percent	Cumulative Percent
Valid	22.0	3	5.17241	5.17241	5.17241
	23.0	3	5.17241	5.17241	10.3448
	24.0	3	5.17241	5.17241	15.5172
	25.0	3	5.17241	5.17241	20.6897
	26.0	3	5.17241	5.17241	25.8621
	27.0	4	6.89655	6.89655	32.7586
	28.0	3	5.17241	5.17241	37.931
	29.0	3	5.17241	5.17241	43.1034
	30.0	7	12.069	12.069	55.1724
	31.0	3	5.17241	5.17241	60.3448
	33.0	3	5.17241	5.17241	65.5172
	35.0	4	6.89655	6.89655	72.4138
	38.0	3	5.17241	5.17241	77.5862
	41.0	3	5.17241	5.17241	82.7586
	45.0	3	5.17241	5.17241	87.931
	48.0	4	6.89655	6.89655	94.8276
	52.0	3	5.17241	5.17241	100
	Total	58	100	100
Pre-Test (FLE-PP)
		Frequency	Percent	Valid Percent	Cumulative Percent
Valid	7.0	3	5.17241	5.17241	5.17241
	8.0	7	12.069	12.069	17.2414
	9.0	10	17.2414	17.2414	34.4828
	10.0	13	22.4138	22.4138	56.8966
	11.0	13	22.4138	22.4138	79.3103
	12.0	6	10.3448	10.3448	89.6552
	13.0	3	5.17241	5.17241	94.8276
	14.0	3	5.17241	5.17241	100
	Total	58	100	100
Post-Test (FLE-PP)
		Frequency	Percent	Valid Percent	Cumulative Percent
Valid	14.0	3	5.17241	5.17241	5.17241
	15.0	3	5.17241	5.17241	10.3448
	16.0	4	6.89655	6.89655	17.2414
	17.0	10	17.2414	17.2414	34.4828
	18.0	12	20.6897	20.6897	55.1724
	19.0	10	17.2414	17.2414	72.4138
	20.0	7	12.069	12.069	84.4828
	21.0	3	5.17241	5.17241	89.6552
	22.0	3	5.17241	5.17241	94.8276
	23.0	3	5.17241	5.17241	100
	Total	58	100	100
Pre-Survey (SPCC)
		Frequency	Percent	Valid Percent	Cumulative Percent
Valid	1.6	3	5.17241	5.17241	5.17241
	1.7	3	5.17241	5.17241	10.3448
	1.8	4	6.89655	6.89655	17.2414
	1.9	7	12.069	12.069	29.3103
	2.0	6	10.3448	10.3448	39.6552
	2.1	3	5.17241	5.17241	44.8276
	2.2	7	12.069	12.069	56.8966
	2.3	6	10.3448	10.3448	67.2414
	2.4	7	12.069	12.069	79.3103
	2.5	3	5.17241	5.17241	84.4828
	2.6	3	5.17241	5.17241	89.6552
	2.9	3	5.17241	5.17241	94.8276
	3.0	3	5.17241	5.17241	100
	Total	58	100	100
Post-Survey (SPCC)
		Frequency	Percent	Valid Percent	Cumulative Percent
Valid	3.4	3	5.17241	5.17241	5.17241
	3.6	3	5.17241	5.17241	10.3448
	3.7	4	6.89655	6.89655	17.2414
	3.8	7	12.069	12.069	29.3103
	3.9	3	5.17241	5.17241	34.4828
	4.0	3	5.17241	5.17241	39.6552
	4.1	6	10.3448	10.3448	50
	4.2	6	10.3448	10.3448	60.3448
	4.3	7	12.069	12.069	72.4138
	4.4	3	5.17241	5.17241	77.5862
	4.5	7	12.069	12.069	89.6552
	4.7	3	5.17241	5.17241	94.8276
	4.9	3	5.17241	5.17241	100
	Total	58	100	100
