# Supplementary material
Source: Research Square preprint supplement (doi:10.21203/rs.3.rs-8950608/v1)
Supplement: Supplementary file 3 [file a453ffae1cd10eb9f40b5d0e.xlsx]

## Sheet: Sheet1
Age	Pre-Test (FLE-PP)	Post-Test (FLE-PP)	Pre-Survey (SPCC)	Post-Survey (SPCC)
22	11	19	1.9	4.3
24	10	18	2.3	4.1
31	9	17	2	3.8
28	12	21	2.6	4.5
45	8	15	1.7	3.6
33	10	18	2.4	4.2
26	13	22	2.9	4.7
52	7	14	1.6	3.4
29	11	20	2.2	4.4
30	10	17	2.1	3.9
23	12	19	2.5	4.1
38	9	18	2	4
41	11	18	2.3	4.2
25	14	23	3	4.9
35	8	16	1.8	3.7
27	10	19	2.4	4.3
48	9	17	1.9	3.8
30	11	20	2.2	4.5
22	11	19	1.9	4.3
24	10	18	2.3	4.1
31	9	17	2	3.8
28	12	21	2.6	4.5
45	8	15	1.7	3.6
33	10	18	2.4	4.2
26	13	22	2.9	4.7
52	7	14	1.6	3.4
29	11	20	2.2	4.4
30	10	17	2.1	3.9
23	12	19	2.5	4.1
38	9	18	2	4
41	11	18	2.3	4.2
25	14	23	3	4.9
35	8	16	1.8	3.7
27	10	19	2.4	4.3
48	9	17	1.9	3.8
30	11	20	2.2	4.5
22	11	19	1.9	4.3
24	10	18	2.3	4.1
31	9	17	2	3.8
28	12	21	2.6	4.5
45	8	15	1.7	3.6
33	10	18	2.4	4.2
26	13	22	2.9	4.7
52	7	14	1.6	3.4
29	11	20	2.2	4.4
30	10	17	2.1	3.9
23	12	19	2.5	4.1
38	9	18	2	4
41	11	18	2.3	4.2
25	14	23	3	4.9
35	8	16	1.8	3.7
27	10	19	2.4	4.3
48	9	17	1.9	3.8
30	11	20	2.2	4.5
35	8	16	1.8	3.7
27	10	19	2.4	4.3
48	9	17	1.9	3.8
30	11	20	2.2	4.5
