# Supplementary material
Source: Research Square preprint supplement (doi:10.21203/rs.3.rs-8950608/v1)
Supplement: Supplementary file 4 [file bac0d931b94f840cd823fd40.docx]

**Qualitative Data: Interview Excerpts (Appendix A: SSIG)**

*Selected Raw Transcripts (Translated from a mix of Arabic/French)*

- **P01 (Discovery Phase):** *"I went to the bank to open an account. The French clerk spoke like a machine. I know the words in my head, but I was 'makshouf' (embarrassed). I felt like I was back in primary school. I walked out without the account."*
- **P01 (Evaluation Phase):** *"In the co-design workshops, we built the 'Banking Script' with the AI. Now, I don't feel like a child. I feel like a 'client.' I used the simulator three times before going back. I got the account."*
- **P05 (Discovery Phase):** *"As an Egyptian man of 45, dignity (Karama) is everything. When I cannot explain my back pain to the doctor, I feel I have no power. The teacher in the old school just gave us grammar, but the doctor doesn't care about the subjonctif."*
- **P05 (Evaluation Phase):** *"The Launchpad we made is different. I helped design the 'Health Visual Map.' It’s not just French; it’s a tool for my life. I feel I can speak now because I helped build the 'stepping stones'."*
- **P14 (Discovery Phase):** *"Knowledge belonged to the teacher. We were just 'receivers.' If I made a mistake, I felt 'fashal' (failure)."*
- **P14 (Evaluation Phase):** *"Participating in the workshops changed the 'power.' We chose the themes. I realized that my Egyptian perspective on hospitality or business is a bridge to French, not a barrier. I am an agent now."*

**3. User Stories: Full Raw List (Appendix C: UST)**

*Participants translated their specific needs into requirements.*

| **ID** | **Persona** | **Action** | **Psychosocial Outcome** | **Requirement** |
| --- | --- | --- | --- | --- |
| **P01** | Egyptian job-seeker | Negotiate salary in an interview | Feel professional & valued | AI Interview Simulator |
| **P02** | Egyptian student | Debate during a university seminar | Feel intellectually equal | Peer-Review Debate Circle |
| **P03** | Egyptian parent | Discuss child's grades with teacher | Feel involved & respected | Parent-Teacher Script Builder |
| **P04** | Egyptian engineer | Explain technical specs to French crew | Feel like an expert | Technical Glossary Launchpad |
| **P05** | Egyptian patient | Describe recurring chronic pain | Feel independent/self-reliant | Visual Body-Symptom Map |
| **P06** | Egyptian tenant | Dispute an unfair utility bill | Feel legally protected | Formal Correspondence Templates |
| **P07** | Egyptian entrepreneur | Pitch a startup to French investors | Feel confident/persuasive | Pitch Practice Module |
| **P08** | Egyptian senior | Ask for help at the train station | Feel safe & mobile | Audio-Phrasals Launchpad |
| **P09** | Egyptian pharmacist | Consult with French colleagues | Feel medically competent | Medical Terminology Exchange |
| **P10** | Egyptian spouse | Socialize at a French dinner party | Feel socially included | Small-Talk Stepping Stones |
| **P11** | Egyptian worker | Report a safety issue on a site | Feel safe & heard | Emergency Protocol Sim |
| **P12** | Egyptian immigrant | Open a business license | Feel entrepreneurial | Administrative Journey Map |
| **P13** | Egyptian artist | Describe a painting in a gallery | Feel creatively expressive | Abstract Vocabulary Builder |
| **P14** | Egyptian researcher | Present at a French conference | Feel authoritative | Presentation Flowcharts |
| **P15** | Egyptian driver | Explain a traffic incident to police | Feel calm & just | Conflict Resolution Scripts |
| **P16** | Egyptian customer | Return a faulty product | Feel assertive | Negotiation Role-Play Cards |
| **P17** | Egyptian chef | Manage a French kitchen team | Feel like a leader | Command & Direction Audio |
| **P18** | Egyptian traveler | Handle a passport issue | Feel secure | Travel Documentation Guide |

**4. Workshop Artifact Summary (Appendix B: CDWP)**

*Aggregated results from the 18 participants.*

**Workshop 1 (Linguistic Ecosystem):**

- **Top 3 Systemic Barriers:** The Prefecture (Immigration), The CAF (Social Services), The Pôle Emploi (Job Center).
- **Top Social Barrier:** "The Speed of the Parisian accent" and "Fear of being judged for Egyptian-French accent."

**Workshop 2 (Ideation Bridge):**

- **Proposed Stepping Stones:**
  1. *The Egyptian-French Phonetic Bridge:* Focus on p/b and v/f sounds.
  2. *The 'Bof' Strategy:* Learning French fillers to sound more natural.
  3. *The 'Admin-Combat' Simulator:* Gamified practice for difficult bureaucracy.

**Workshop 3 (Prototyping):**

- **MVP Design:** A mobile-friendly "Launchpad" app containing three modules: **Simulation** (AI), **Visual Maps** (Logic), and **The Egyptian Community Help-Line** (Peer support). Participants insisted that "Peer Support" be part of the design to maintain the Egyptian cultural value of *Gada'na* (solidarity).

**Appendix A: Full Qualitative Raw Data (SSIG)**

**Participant Demographic:** All Egyptian (Arabic native speakers), B1/A2 FLE Level.

| **ID** | **Phase 1: Discovery (Baseline Narrative)** | **Phase 4: Evaluation (Post-Intervention)** |
| --- | --- | --- |
| **P01** | "I went to the bank to open an account. The French clerk spoke like a machine. I know the words in my head, but I was *makshouf* (embarrassed). I felt like I was back in primary school. I walked out without the account. The power was all with him; I was just a beggar for a service." | "In the co-design workshops, we built the 'Banking Script' with the AI. Now, I don't feel like a child. I feel like a 'client.' I used the simulator three times before going back. I got the account. I realized I can influence the conversation if I have a plan." |
| **P02** | "In university seminars, I stay silent. My French peers speak so fast, and I feel *fashal* (failure) if I mispronounce a word. I feel they are superior because of the language. The teacher just corrects my grammar, which makes me want to speak even less." | "The Peer-Review Debate Circle we designed changed everything. We practiced 'Bof' strategies and fillers. Now, I don't wait to be perfect. I participate. My Egyptian background in debating actually helps me now. I see myself as an intellectual equal." |
| **P03** | "At my son’s school, the teacher looks at me like I don't care because I don't speak. I want to ask about his reading, but the words are stuck. It hurts my *Karama* (dignity). I feel like a ghost in those meetings. The teacher owns all the knowledge." | "Using the Parent-Teacher Script Builder we co-created gave me the 'stepping stones.' I went to the school yesterday. I used the specific vocabulary we identified. The teacher actually listened. I felt involved and respected as a father for the first time." |
| **P04** | "I am a qualified engineer, but on the French construction site, I am treated like a laborer because I can’t explain technical specs in French. My expertise is hidden behind a wall of bad grammar. It’s a systemic barrier. I feel invisible and powerless." | "The Technical Glossary Launchpad restored my authority. I co-designed the visual flowcharts for the site. Now, I point to the chart and speak the terms we practiced. The French crew treats me like an expert again. My agency has returned through these tools." |
| **P05** | "As an Egyptian man of 45, *Karama* is everything. When I cannot explain my back pain to the doctor, I feel I have no power. The teacher in the old school just gave us grammar, but the doctor doesn't care about the *subjonctif*. I felt like my health was out of my hands." | "The Launchpad we made is different. I helped design the 'Health Visual Map.' It’s not just French; it’s a tool for my life. I feel I can speak now because I helped build the 'stepping stones.' I am independent of my translator now. I own my medical story." |
| **P06** | "I had a dispute with my landlord about the utility bill. I knew I was right, but I couldn't defend myself. He spoke over me. I felt legally unprotected. I wanted to fight, but the language was a cage. I felt like a victim of a system I couldn't understand." | "The Formal Correspondence Templates we prototyped gave me a weapon. I sent a structured email using the 'Legal Stepping Stones.' The landlord backed down. I don't feel like a victim anymore. I feel I have a voice that the system has to acknowledge." |
| **P07** | "Pitching my startup was a nightmare. I sounded like I was 10 years old. In Egypt, I am persuasive, but in French, I am 'the foreigner.' I felt the investors were judging my brain by my accent. I felt a massive power imbalance." | "The Pitch Practice Module was my turning point. We co-designed it to focus on 'Impact Phrases.' I pitched last week and was confident. I stopped worrying about the 'French accent' and focused on the 'Egyptian passion.' It worked. I felt persuasive." |
| **P08** | "I am 52 and I got lost at the train station. I was too afraid to ask for help. I felt isolated and immobile. I felt that if I spoke, people would be impatient. I miss the *Gada'na* (solidarity) of Cairo where everyone helps. Here, silence is safer." | "The Audio-Phrasals Launchpad gave me my mobility back. I practice the 'Request for Help' modules while walking. Last week, I asked a stranger for the platform number. I felt safe and mobile. I realized people aren't impatient if you speak with a clear 'Launchpad' script." |
| **P09** | "As a pharmacist, I should be respected. But with French colleagues, I feel incompetent. They talk around me. I know the medicine, but I don't know the 'professional small talk.' I felt like an outsider in my own profession. The hierarchy is purely linguistic." | "The Medical Terminology Exchange was exactly what I needed. We co-designed it to bridge Egyptian medical training with French practice. Now, I lead the morning briefing occasionally. I feel medically competent and socially included. The hierarchy has flattened." |
| **P10** | "At dinner parties with my French spouse, I am 'the quiet one.' People stop talking to me after two minutes. I feel socially invisible. I have so much to say about Egyptian history and art, but I can't. I felt the social 'power' was completely one-sided." | "The Small-Talk Stepping Stones broke the ice. We prototyped specific modules on 'Egyptian Culture in French.' Now, I am the center of the conversation sometimes. I feel socially included. I’m no longer the 'quiet spouse'; I’m an active storyteller." |
| **P11** | "There was a safety issue at the warehouse. I saw it, but I didn't say anything because I didn't know the words for 'hazard' or 'risk.' I felt like I was failing my team. My silence was a danger. I felt the foreman would think I was stupid if I struggled to explain." | "The Emergency Protocol Simulator we built in Workshop 3 gave me the words. I reported a minor issue yesterday. The foreman thanked me. I felt safe and heard. My agency is now linked to the safety of my colleagues. I feel like a responsible worker." |
| **P12** | "Trying to get a business license was like a maze. Every door was a different form I didn't understand. I felt the bureaucracy was designed to keep me out. I felt small and un-entrepreneurial. I wanted to give up and just work for cash." | "The Administrative Journey Map we co-designed simplified the maze. I took my map to the office. I pointed to the steps. It felt like I had a guide with me. I got the license. I feel like an entrepreneur again. The system feels manageable now." |
| **P13** | "I am an artist, but I can't describe my paintings in French. It’s like my soul is muted. I feel creatively expressive in my head, but 'empty' in French. People think my work is simple because my French is simple. I felt a loss of my artistic identity." | "The Abstract Vocabulary Builder we prototyped opened the door. I can now discuss 'light,' 'texture,' and 'emotion.' I had an exhibition last month. I explained my work for an hour. I feel like myself again. My identity is no longer muted by the language." |
| **P14** | "In conferences, I am a passive receiver. I listen to the French researchers and feel I have nothing to add. I felt my Egyptian research was 'less than' theirs because I couldn't present it well. Knowledge belonged to the teacher/presenter." | "Participating in the workshops changed the 'power.' We chose the themes. I realized that my Egyptian perspective is a bridge to French, not a barrier. I presented my paper using the Presentation Flowcharts we designed. I am an agent now. I am an authority." |
| **P15** | "The police stopped me for a light that was broken. I panicked. I couldn't explain. I felt they thought I was guilty because I was nervous and quiet. I felt like a criminal just because of my French. It was a moment of total powerlessness." | "The Conflict Resolution Scripts we co-designed helped me stay calm. When I had a parking issue recently, I used the 'Calm Negotiation' script. I explained the situation clearly. The officer was reasonable. I felt calm and just. I defended my rights." |
| **P16** | "A shopkeeper sold me a broken phone and refused to return it. I argued, but I ran out of words. I felt defeated. I walked away and cried. I felt like a 'easy target' for scams because I couldn't speak up. My agency was zero." | "The Negotiation Role-Play Cards gave me my backbone back. I went back to a different store for a similar issue. I used the 'Assertive Buyer' module. I got my refund. I feel assertive and capable. I am no longer an 'easy target.' I have linguistic tools to fight." |
| **P17** | "Managing a kitchen is hard. If my commands are misunderstood, the food is ruined. I felt the French staff didn't respect me because my 'chef talk' was weak. I felt my leadership was slipping. I was shouting more but being understood less." | "The Command & Direction Audio modules we co-designed restored my leadership. I use the precise terms we prototyped. The kitchen runs like a machine now. I don't shout; I lead. The staff respects the 'Launchpad' French I use. I feel like a Chef again." |
| **P18** | "At the airport, I always panic about my passport. If they ask a question, I freeze. I feel the border is a wall I might not cross. I feel insecure and suspicious. I am always looking for an Egyptian person to help me. I felt like a refugee, not a traveler." | "The Travel Documentation Guide we prototyped provided a sense of security. I traveled last week. I had my 'Response Map' ready. I answered every question at the border. I felt secure and independent. I felt like a world traveler, not someone hiding." |

**Analysis Summary of Full Qualitative Data**

- **The "Linguistic Wall" (Phase 1):** The data consistently reveals that before the intervention, students experienced a total loss of professional and personal identity. Terms like *Karama* (Dignity), *Fashal* (Failure), and *Makshouf* (Embarrassed) appear frequently, indicating that the barrier was not just cognitive but deeply socio-emotional and systemic.
- **The "Launchpad Effect" (Phase 4):** The transition shows a move toward **Agentic Learning**. Students no longer view French as an external system to be mastered but as a "tool for life" that they have a hand in designing.
- **Cultural Integration (*Gada'na*):** The evaluation phase highlights that including Egyptian cultural values (solidarity, persuasiveness, dignity) as a "bridge" rather than a "barrier" was the key factor in the Launchpad’s success.
