# Supplementary material
Source: Research Square preprint supplement (doi:10.21203/rs.3.rs-8950608/v1)
Supplement: Supplementary file 5 [file d01b6376967737acc53b5a1c.xlsx]

## Sheet: Sheet1
GET DATA /TYPE=XLSX
/FILE='C:\Users\Mobi lap\Desktop\فاطمه\22.xlsx'
/SHEET=name 'Sheet1'
/CELLRANGE=full
/READNAMES=on
/ASSUMEDSTRWIDTH=32767.
EXECUTE.
DATASET NAME $DataSet WINDOW=FRONT.
T-TEST PAIRS=PreTestFLEPP PreSurveySPCC WITH PostTestFLEPP PostSurveySPCC (PAIRED)
/CRITERIA=CI(.9500)
/MISSING=ANALYSIS.
T-Test
Notes
Output Created		14-JAN-2026 22:51:11
Comments
Input	Active Dataset	$DataSet
	Filter	<none>
	Weight	<none>
	Split File	<none>
	N of Rows in Working Data File	58
Missing Value Handling	Definition of Missing	User defined missing values are treated as missing.
	Cases Used	Statistics for each analysis are based on the cases with no missing or out-of-range data for any variable in the analysis.
Syntax		T-TEST PAIRS=PreTestFLEPP PreSurveySPCC WITH PostTestFLEPP PostSurveySPCC (PAIRED) /CRITERIA=CI(.9500) /MISSING=ANALYSIS.
Resources	Processor Time	00:00:00.00
	Elapsed Time	00:00:00.00
[$DataSet]
Paired Samples Statistics
		Mean	N	Std. Deviation	Std. Error Mean
Pair 1	Pre-Test (FLE-PP)	10.2241	58	1.74761	0.229473
	Post-Test (FLE-PP)	18.3621	58	2.22189	0.291748
Pair 2	Pre-Survey (SPCC)	2.20172	58	0.371101	0.048728
	Post-Survey (SPCC)	4.12931	58	0.382058	0.0501666
Paired Samples Correlations
		N	Correlation	Sig.
Pair 1	Pre-Test (FLE-PP) & Post-Test (FLE-PP)	58	0.945613	5.45501e-29
Pair 2	Pre-Survey (SPCC) & Post-Survey (SPCC)	58	0.870754	6.60362e-19
Paired Samples Test
		Paired Differences					t	df	Sig. (2-tailed)
		Mean	Std. Deviation	Std. Error Mean	95% Confidence Interval of the Difference
					Lower	Upper
Pair 1	Pre-Test (FLE-PP) - Post-Test (FLE-PP)	-8.13793	0.804554	0.105643	-8.34948	-7.92638	-77.0322	57	2.55785e-59
Pair 2	Pre-Survey (SPCC) - Post-Survey (SPCC)	-1.92759	0.191754	0.0251785	-1.97801	-1.87717	-76.5568	57	3.62816e-59
