# Supplementary material
Source: Research Square preprint supplement (doi:10.21203/rs.3.rs-8950608/v1)
Supplement: Supplementary file 6 [file d20181c8421da1bf72499fd0.docx]

**Appendix A**

**Semi-Structured Interview Guide (SSIG)**

**Study Title:** [Insert Study Title]
**Phase:** Phase 1 (Discovery) & Phase 4 (Evaluation)
**Instrument Code:** SSIG
**Duration:** 30–45 minutes
**Mode:** Individual interview (audio-recorded with consent)

**Purpose**

This interview guide is used longitudinally to (a) establish a baseline of linguistic discontinuity and affective barriers (Phase 1) and (b) evaluate changes in perceived communicative competence and learner agency following the intervention (Phase 4).
**Aligned Research Questions:** RQ3 (Communicative Competence), RQ4 (Power and Agency)

**Interviewer Opening Script**

Thank you for participating in this interview. Your responses will be kept confidential and used only for research purposes. Participation is voluntary, and you may skip any question or stop at any time. With your permission, this interview will be audio-recorded.

☐ Permission to record granted  ☐ Permission declined

**Section A: Narrative Baseline and Affective Filter**

1. **Critical Incident Prompt**
   *Reflecting on your life in a French-speaking environment, describe one specific interaction where you felt your French was insufficient.*
   - Where did it take place and with whom?
   - What were you trying to say?
   - What emotions did you experience?
   - What practical consequences followed?

**Section B: Self-Perceived Communication Competence**

1. **Dyadic Context**
   *How would you describe your ability to maintain a one-on-one conversation with a native French speaker without switching languages?*
2. **Public / Institutional Context**
   *In high-stakes environments (e.g., prefecture, hospital), what linguistic barriers do you encounter when explaining a complex issue?*
3. **Small-Group Context**
   *In group discussions, do you see yourself as an active contributor or a passive observer? What factors influence this role?*

**Section C: Power and Agency**

1. **Prior Classroom Experience**
   *In previous French classes, who “owned” the knowledge, and how did that affect your willingness to take linguistic risks?*
2. **Post-Intervention Reflection (Phase 4)**
   *Has participating in the co-design process changed how you view yourself as a learner? Do you feel you can influence how French is taught to you?*

**Closing**

1. *Is there anything else about your experience that you would like to add?*

**Participant Code:** ___________
**Interviewer:** ___________  **Date:** ___________

**Participant Signature:** ___________________________
**Researcher Signature:** ___________________________

**Appendix B**

**Co-Design Workshop Protocol (CDWP)**

**Instrument Code:** CDWP
**Methodological Framework:** Action Research & Service Design
**Aligned Research Questions:** RQ1, RQ2, RQ4

**Workshop 1: Linguistic Ecosystem and Hurdle Map (Discovery Phase)**

**Objective:** Identify daily linguistic pain points and classify barriers.
**Activity:** Participants map a typical day and mark moments of high linguistic friction using “Hurdle Stickers.”

**Facilitator Prompt:**

*Identify three moments where French feels like a barrier rather than a bridge. Is the barrier technical, social, or systemic?*

**Outputs:** Experience maps, ranked pain points, annotated notes.

**Workshop 2: Ideation Bridge and Future-State Journey (Ideation Phase)**

**Objective:** Generate pedagogical interventions that connect classroom learning to real-world use.
**Activity:** “Bridge Building” from classroom (Point A) to real-life context (Point B).

**Facilitator Prompt:**

*Design three pedagogical stepping stones that would make this journey possible.*

**Outputs:** Bridge sketches, intervention clusters, priority votes.

**Workshop 3: Minimum Viable Launchpad (Prototyping Phase)**

**Objective:** Co-construct a learner-controlled pedagogical tool.
**Activity:** Assemble a 15-minute learning module using Pedagogical Building Blocks.

**Facilitator Prompt:**

*How does your design ensure that you are the agent in control of the communication?*

**Outputs:** MVP module blueprint and justification.

**Participant Code(s):** ___________________________
**Facilitator:** ___________________________  **Date:** ___________

**Appendix C**

**User Story Template (UST)**

**Instrument Code:** UST
**Purpose:** Translate learner needs into concrete pedagogical design specifications
**Aligned Research Question:** RQ2

**User Story Form**

1. **Persona (Identity and Context)**
   *As a* _______________________________________________
2. **Communicative Action (Intent)**
   *I want to be able to* _______________________________________________
3. **Value / Psychosocial Outcome**
   *So that I feel* _______________________________________________
4. **Design Requirement**
   *To achieve this, the Launchpad must provide*

**Optional Acceptance Criteria**

- Task completed in French with minimal language switching ☐
- Ability to handle follow-up questions ☐
- Use of context-appropriate vocabulary ☐

**Participant Code:** ___________  **Date:** ___________

**Participant Signature:** ___________________________

**Appendix D**

**Pre-Test and Post-Test Proficiency Assessment (FLE A2/B1)**

**Instrument Code:** FLE-PP
**Benchmark:** CEFR A2/B1 (DELF-aligned)

**Part 1: Oral Production and Interaction**

**Duration:** 5 minutes

**Form A (Pre-Test):** *Au bureau de poste*
Explain the need to send a fragile urgent package and inquire about insurance.

**Form B (Post-Test):** *Chez le médecin*
Describe recurring back pain and request a specialist referral.

**Part 2: Written Production (100–120 words)**

**Form A:** Letter to landlord reporting a bathroom leak.
**Form B:** Email to employer requesting job information and explaining suitability.

**Scoring Rubric (1–5 per criterion; Total = 25)**

| **Criterion** | **Description** |
| --- | --- |
| Linguistic Precision | Grammar and syntax accuracy |
| Lexical Range | Task-specific vocabulary |
| Communicative Efficiency | Clarity and goal achievement |
| Interactional Fluency | Responsiveness (oral only) |
| Coherence & Organization | Logical structure |

**Rater 1:** ____________________  Score: ______
**Rater 2:** ____________________  Score: ______

**Appendix E**

**Self-Perceived Communication Competence (SPCC) Survey**

**Instrument Code:** SPCC-FLE
**Administration:** Week 1 and Week 8
**Scale:** 1 = Not at all confident → 5 = Completely confident

**Instructions**

Please indicate how confident you feel using French in each situation.

| **No.** | **Statement** | **1** | **2** | **3** | **4** | **5** |
| --- | --- | --- | --- | --- | --- | --- |
| 1 | Starting a conversation with a neighbor | ☐ | ☐ | ☐ | ☐ | ☐ |
| 2 | Explaining a complex issue to an official | ☐ | ☐ | ☐ | ☐ | ☐ |
| 3 | Speaking in a small group | ☐ | ☐ | ☐ | ☐ | ☐ |
| 4 | Resolving a misunderstanding with a shopkeeper | ☐ | ☐ | ☐ | ☐ | ☐ |
| 5 | Feeling respected when speaking publicly | ☐ | ☐ | ☐ | ☐ | ☐ |
| 6 | Influencing how I learn French in this class | ☐ | ☐ | ☐ | ☐ | ☐ |
| 7 | Defending my rights in French | ☐ | ☐ | ☐ | ☐ | ☐ |
| 8 | Using digital tools (e.g., AI) to practice French | ☐ | ☐ | ☐ | ☐ | ☐ |

**Participant Code:** ___________  **Date:** ___________

**Participant Signature:** ___________________________
